# Supplementary material for: Assessment of Potentially Toxic Elements in the Urban Soil and Plants of Kirkuk City in Iraq
Source: MDPI journal article supplement (doi:10.3390/su14095655), 2022-05-07
Supplement: s1 [file s1]

## Geo-accumulation Index (Igeo)

Table S1. Assessment of Geo-Accumulation Index (Igeo)

| I-geo class | Igeo value range          | Soil Quality                       |
|-------------|---------------------------|------------------------------------|
| 0           | $I\text{-geo} < 0$        | unpolluted                         |
| 1           | $0 \leq I\text{-geo} < 1$ | unpolluted to moderately polluted  |
| 2           | $1 \leq I\text{-geo} < 2$ | moderately polluted                |
| 3           | $2 \leq I\text{-geo} < 3$ | moderately to strongly polluted    |
| 4           | $3 \leq I\text{-geo} < 4$ | strongly polluted                  |
| 5           | $4 \leq I\text{-geo} < 5$ | strongly to very strongly polluted |
| 6           | $I\text{-geo} \geq 5$     | very strongly polluted             |

Data

|              | Geoaccumulation Index (Igeo) |       |       |       |       |       |      |       |      |       |       |       |
|--------------|------------------------------|-------|-------|-------|-------|-------|------|-------|------|-------|-------|-------|
| Monster naam | Mg                           | Al    | Cr    | Co    | Ni    | Cu    | As   | Se    | Cd   | Hg    | Tl    | Pb    |
| S1           | -0.32                        | -2.11 | -0.05 | -0.77 | 0.60  | -0.71 | 1.49 | -4.18 | 0.65 | -2.91 | -2.91 | -0.03 |
| S2           | -1.01                        | -2.83 | 0.27  | -1.41 | -0.02 | 2.49  | 1.09 | -4.70 | 1.82 | -2.91 | -3.57 | 2.46  |
| S3           | -0.07                        | -2.06 | -0.05 | -0.67 | 0.86  | -0.58 | 1.60 | -3.88 | 0.93 | -2.91 | -2.73 | 0.08  |
| S4           | -0.73                        | -2.74 | -0.48 | -1.21 | 0.08  | 0.55  | 1.26 | -4.45 | 1.98 | -2.10 | -3.61 | 1.39  |
| S5           | -0.86                        | -2.74 | -0.05 | -1.36 | -0.07 | -0.64 | 1.15 | -4.43 | 0.21 | -2.91 | -3.71 | 0.23  |
| S6           | -0.23                        | -2.67 | 0.17  | -1.09 | 0.57  | -1.14 | 1.21 | -4.44 | 0.29 | -2.91 | -3.69 | -1.49 |
| S7           | -0.62                        | -2.33 | 0.27  | -0.97 | 0.51  | -0.53 | 1.49 | -4.38 | 0.98 | -2.91 | -3.23 | 0.42  |

|            |       |       |      |       |      |       |      |       |      |       |       |       |
|------------|-------|-------|------|-------|------|-------|------|-------|------|-------|-------|-------|
| <b>S8</b>  | -0.32 | -2.52 | 0.45 | -1.09 | 0.20 | -0.64 | 1.24 | -4.36 | 0.77 | -2.37 | -3.35 | 0.37  |
| <b>S9</b>  | -0.07 | -2.16 | 0.17 | -0.58 | 0.98 | -0.47 | 1.57 | -3.99 | 0.71 | -2.91 | -3.01 | -1.49 |
| <b>S10</b> | -0.07 | -2.27 | 0.27 | -0.87 | 0.74 | -0.91 | 1.51 | -4.19 | 0.37 | -2.91 | -3.23 | -1.21 |

### ***Bioaccumulation Factor (BAF)***

Data

|                          | <b>Bioaccumulation Factor (BAF)</b> |           |           |           |           |           |           |           |           |           |           |           |
|--------------------------|-------------------------------------|-----------|-----------|-----------|-----------|-----------|-----------|-----------|-----------|-----------|-----------|-----------|
| <b>Monst<br/>er naam</b> | <b>Mg</b>                           | <b>Al</b> | <b>Cr</b> | <b>Co</b> | <b>Ni</b> | <b>Cu</b> | <b>As</b> | <b>Se</b> | <b>Cd</b> | <b>Hg</b> | <b>Tl</b> | <b>Pb</b> |
| <b>E1</b>                | 0.16                                | 0.01      | 0.00      | 0.02      | 0.14      | 0.18      | 0.04      | 0.18      | 0.25      | 2.05      | 0.33      | 0.03      |
| <b>E2</b>                | 0.56                                | 0.02      | 0.01      | 0.04      | 0.15      | 0.03      | 0.05      | 0.26      | 0.19      | 1.75      | 0.53      | 0.01      |
| <b>E3</b>                | 0.23                                | 0.04      | 0.02      | 0.03      | 0.12      | 0.30      | 0.05      | 0.15      | 0.23      | 1.80      | 0.29      | 0.04      |
| <b>E4</b>                | 0.25                                | 0.03      | 0.03      | 0.03      | 0.14      | 0.20      | 0.05      | 0.22      | 0.11      | 0.66      | 0.54      | 0.03      |
| <b>E5</b>                | 0.42                                | 0.03      | 0.02      | 0.04      | 0.22      | 0.28      | 0.05      | 0.22      | 0.29      | 1.50      | 0.58      | 0.03      |
| <b>E6</b>                | 0.12                                | 0.04      | 0.03      | 0.08      | 0.08      | 0.33      | 0.15      | 0.22      | 0.42      | 1.00      | 0.57      | 0.15      |
| <b>E7</b>                | 0.28                                | 0.05      | 0.03      | 0.04      | 0.18      | 0.23      | 0.10      | 0.21      | 0.17      | 1.50      | 0.42      | 0.05      |
| <b>E8</b>                | 0.13                                | 0.02      | 0.01      | 0.02      | 0.11      | 0.26      | 0.10      | 0.20      | 0.27      | 1.34      | 0.45      | 0.03      |
| <b>E9</b>                | 0.16                                | 0.02      | 0.01      | 0.04      | 0.17      | 0.28      | 0.04      | 0.16      | 0.21      | 2.20      | 0.36      | 0.07      |
| <b>E10</b>               | 0.21                                | 0.01      | 0.01      | 0.05      | 0.01      | 0.29      | 0.03      | 0.18      | 0.27      | 1.40      | 0.42      | 0.05      |
|                          |                                     |           |           |           |           |           |           |           |           |           |           |           |
| <b>N1</b>                | 0.21                                | 0.01      | 0.01      | 0.10      | 0.04      | 0.27      | 0.04      | 0.18      | 0.91      | 2.45      | 0.33      | 0.04      |
| <b>N2</b>                | 0.27                                | 0.03      | 0.01      | 0.05      | 0.05      | 0.03      | 0.04      | 0.26      | 0.33      | 1.00      | 0.53      | 0.01      |

|            |      |      |      |      |      |      |      |      |      |      |      |      |
|------------|------|------|------|------|------|------|------|------|------|------|------|------|
| <b>N3</b>  | 0.23 | 0.03 | 0.03 | 0.12 | 0.05 | 0.23 | 0.06 | 0.15 | 0.39 | 1.00 | 0.29 | 0.06 |
| <b>N4</b>  | 0.17 | 0.04 | 0.03 | 0.07 | 0.07 | 0.17 | 0.06 | 0.22 | 0.26 | 0.57 | 0.54 | 0.06 |
| <b>N5</b>  | 0.55 | 0.05 | 0.03 | 0.08 | 0.08 | 0.26 | 0.09 | 0.22 | 0.76 | 1.00 | 0.58 | 0.05 |
| <b>N6</b>  | 0.21 | 0.03 | 0.02 | 0.06 | 0.24 | 0.31 | 0.10 | 0.22 | 0.42 | 2.10 | 0.57 | 0.12 |
| <b>N7</b>  | 0.27 | 0.03 | 0.02 | 0.11 | 0.07 | 0.32 | 0.07 | 0.21 | 0.30 | 1.65 | 0.42 | 0.04 |
| <b>N8</b>  | 0.16 | 0.01 | 0.01 | 0.04 | 0.03 | 0.22 | 0.04 | 0.20 | 0.44 | 0.69 | 0.45 | 0.03 |
| <b>N9</b>  | 0.14 | 0.02 | 0.01 | 0.10 | 0.04 | 0.26 | 0.04 | 0.16 | 0.25 | 1.00 | 0.36 | 0.12 |
| <b>N10</b> | 0.25 | 0.01 | 0.01 | 0.02 | 0.09 | 0.31 | 0.03 | 0.18 | 0.35 | 1.80 | 0.42 | 0.03 |

### ***Contamination Factor (CF)***

Table S2. Contamination factor (CF) values' categories for describing the contamination level [55].

| <b>Range</b>           | <b>Category</b>            |
|------------------------|----------------------------|
| CF < 1                 | low contamination          |
| $1 \leq \text{CF} < 3$ | moderate contamination     |
| $3 \leq \text{CF} < 6$ | considerable contamination |
| CF $\geq 6$            | very high contamination    |

### ***Pollution Load Index***

Table S3. PLI value representing soil quality

| <b>Range</b>            | <b>Category</b>                   |
|-------------------------|-----------------------------------|
| $0 < \text{PLI} \leq 1$ | Unpolluted                        |
| $1 < \text{PLI} \leq 2$ | Moderately polluted to unpolluted |
| $2 < \text{PLI} \leq 3$ | Moderately polluted               |
| $3 < \text{PLI} \leq 4$ | Moderately to highly polluted     |
| $4 < \text{PLI} \leq 5$ | Highly polluted                   |
| $5 < \text{PLI}$        | Very highly polluted              |

Data-

|              | Contamination Factor (CF) |    |      |    |      |      |      |    |      |    |    |      |                            |
|--------------|---------------------------|----|------|----|------|------|------|----|------|----|----|------|----------------------------|
| Monster naam | Mg                        | Al | Cr   | Co | Ni   | Cu   | As   | Se | Cd   | Hg | Tl | Pb   | Pollution Load Index (PLI) |
| E1           |                           |    | 0.01 |    | 2.31 | 0.41 | 1.45 |    | 0.23 |    |    | 0.03 | 0.19                       |
| E2           |                           |    | 0.23 |    | 1.65 | 0.58 | 1.40 |    | 0.40 |    |    | 0.04 | 0.41                       |
| E3           |                           |    | 0.33 |    | 2.31 | 0.75 | 1.79 |    | 0.26 |    |    | 0.04 | 0.46                       |
| E4           |                           |    | 0.30 |    | 1.65 | 1.11 | 1.45 |    | 0.26 |    |    | 0.08 | 0.50                       |
| E5           |                           |    | 0.27 |    | 2.31 | 0.68 | 1.34 |    | 0.20 |    |    | 0.03 | 0.38                       |
| E6           |                           |    | 0.51 |    | 1.31 | 0.56 | 4.41 |    | 0.30 |    |    | 0.05 | 0.54                       |
| E7           |                           |    | 0.55 |    | 2.81 | 0.61 | 3.52 |    | 0.20 |    |    | 0.07 | 0.59                       |
| E8           |                           |    | 0.23 |    | 1.34 | 0.62 | 2.91 |    | 0.27 |    |    | 0.03 | 0.41                       |
| E9           |                           |    | 0.23 |    | 3.64 | 0.76 | 1.40 |    | 0.20 |    |    | 0.02 | 0.40                       |
| E10          |                           |    | 0.12 |    | 0.11 | 0.58 | 0.89 |    | 0.20 |    |    | 0.02 | 0.17                       |
|              | Mg                        | Al | Cr   | Co | Ni   | Cu   | As   | Se | Cd   | Hg | Tl | Pb   | Pollution Load Index (PLI) |
| N1           |                           |    | 0.14 |    | 0.60 | 0.63 | 1.34 |    | 0.84 |    |    | 0.03 | 0.36                       |
| N2           |                           |    | 0.19 |    | 0.51 | 0.58 | 1.06 |    | 0.68 |    |    | 0.04 | 0.35                       |
| N3           |                           |    | 0.45 |    | 1.07 | 0.58 | 2.35 |    | 0.44 |    |    | 0.05 | 0.50                       |
| N4           |                           |    | 0.37 |    | 0.83 | 0.91 | 1.84 |    | 0.60 |    |    | 0.14 | 0.59                       |
| N5           |                           |    | 0.46 |    | 0.88 | 0.63 | 2.51 |    | 0.52 |    |    | 0.05 | 0.51                       |
| N6           |                           |    | 0.35 |    | 3.97 | 0.52 | 2.79 |    | 0.30 |    |    | 0.04 | 0.54                       |
| N7           |                           |    | 0.32 |    | 1.14 | 0.84 | 2.57 |    | 0.35 |    |    | 0.04 | 0.48                       |

|     |           |           |           |           |           |           |           |           |           |           |           |           |                                   |
|-----|-----------|-----------|-----------|-----------|-----------|-----------|-----------|-----------|-----------|-----------|-----------|-----------|-----------------------------------|
| N8  |           |           | 0.10      |           | 0.43      | 0.53      | 1.06      |           | 0.44      |           |           | 0.03      | 0.26                              |
| N9  |           |           | 0.23      |           | 0.93      | 0.70      | 1.51      |           | 0.24      |           |           | 0.04      | 0.36                              |
| N10 |           |           | 0.14      |           | 1.62      | 0.62      | 1.23      |           | 0.27      |           |           | 0.01      | 0.29                              |
|     |           |           |           |           |           |           |           |           |           |           |           |           |                                   |
|     | <b>Mg</b> | <b>Al</b> | <b>Cr</b> | <b>Co</b> | <b>Ni</b> | <b>Cu</b> | <b>As</b> | <b>Se</b> | <b>Cd</b> | <b>Hg</b> | <b>Tl</b> | <b>Pb</b> | <b>Pollution Load Index (PLI)</b> |
| S1  | 1.20      | 0.35      | 1.45      | 0.88      | 2.27      | 0.92      | 4.20      | 0.08      | 2.35      | 0.20      | 0.20      | 1.47      | 0.78                              |
| S2  | 0.74      | 0.21      | 1.81      | 0.56      | 1.48      | 8.40      | 3.20      | 0.06      | 5.31      | 0.20      | 0.13      | 8.24      | 0.93                              |
| S3  | 1.43      | 0.36      | 1.45      | 0.94      | 2.73      | 1.00      | 4.53      | 0.10      | 2.86      | 0.20      | 0.23      | 1.59      | 0.87                              |
| S4  | 0.90      | 0.22      | 1.07      | 0.65      | 1.59      | 2.20      | 3.60      | 0.07      | 5.92      | 0.35      | 0.12      | 3.94      | 0.84                              |
| S5  | 0.83      | 0.22      | 1.45      | 0.58      | 1.43      | 0.96      | 3.33      | 0.07      | 1.73      | 0.20      | 0.11      | 1.76      | 0.62                              |
| S6  | 1.28      | 0.24      | 1.69      | 0.71      | 2.23      | 0.68      | 3.47      | 0.07      | 1.84      | 0.20      | 0.12      | 0.54      | 0.62                              |
| S7  | 0.98      | 0.30      | 1.81      | 0.76      | 2.14      | 1.04      | 4.20      | 0.07      | 2.96      | 0.20      | 0.16      | 2.00      | 0.78                              |
| S8  | 1.20      | 0.26      | 2.05      | 0.71      | 1.73      | 0.96      | 3.53      | 0.07      | 2.55      | 0.29      | 0.15      | 1.94      | 0.77                              |
| S9  | 1.43      | 0.34      | 1.69      | 1.00      | 2.95      | 1.08      | 4.47      | 0.09      | 2.45      | 0.20      | 0.19      | 0.54      | 0.78                              |
| S10 | 1.43      | 0.31      | 1.81      | 0.82      | 2.50      | 0.80      | 4.27      | 0.08      | 1.94      | 0.20      | 0.16      | 0.65      | 0.72                              |

### *Determination of Potential Ecological Risk*

Table S4. Interpretation categories of potential ecological risk and ecological risk index

| Potential ecological risk ( $E_r^i$ ) |              | Potential ecological risk index (RI) |              |
|---------------------------------------|--------------|--------------------------------------|--------------|
| Range                                 | Category     | Range                                | Category     |
| $E_r^i < 40$                          | Low          | $RI \leq 150$                        | Low          |
| $40 \leq E_r^i < 80$                  | Moderate     | $150 \leq RI < 300$                  | Moderate     |
| $80 \leq E_r^i < 160$                 | Considerable | $300 \leq RI < 600$                  | Considerable |
| $160 \leq E_r^i < 320$                | High         | $600 \leq RI$                        | Very high    |

$$E_r^i \geq 320$$

Very high

Data-

|                  | Ecological Risk (Eri) |        |      |    |           |      |       |        |       |    |        |      |                                       |
|------------------|-----------------------|--------|------|----|-----------|------|-------|--------|-------|----|--------|------|---------------------------------------|
| Monste<br>r naam | M<br>g                | A<br>l | Cr   | Co | Ni        | Cu   | As    | S<br>e | Cd    | Hg | T<br>l | Pb   | Potential<br>Ecological<br>Risk (PER) |
| E1               |                       |        | 0.01 |    | 13.8<br>8 | 2.06 | 14.53 |        | 6.96  |    |        | 0.13 | 37.57                                 |
| E2               |                       |        | 0.45 |    | 9.92      | 2.91 | 13.97 |        | 12.00 |    |        | 0.18 | 39.43                                 |
| E3               |                       |        | 0.67 |    | 13.8<br>8 | 3.77 | 17.88 |        | 7.80  |    |        | 0.18 | 44.18                                 |
| E4               |                       |        | 0.60 |    | 9.92      | 5.53 | 14.53 |        | 7.80  |    |        | 0.40 | 38.77                                 |
| E5               |                       |        | 0.55 |    | 13.8<br>8 | 3.42 | 13.41 |        | 6.00  |    |        | 0.14 | 37.40                                 |
| E6               |                       |        | 1.02 |    | 7.83      | 2.81 | 44.13 |        | 9.00  |    |        | 0.25 | 65.06                                 |
| E7               |                       |        | 1.10 |    | 16.8<br>6 | 3.07 | 35.20 |        | 6.00  |    |        | 0.33 | 62.54                                 |
| E8               |                       |        | 0.45 |    | 8.03      | 3.12 | 29.05 |        | 8.04  |    |        | 0.17 | 48.86                                 |
| E9               |                       |        | 0.45 |    | 21.8<br>2 | 3.82 | 13.97 |        | 6.00  |    |        | 0.12 | 46.18                                 |
| E10              |                       |        | 0.24 |    | 0.66      | 2.91 | 8.94  |        | 6.12  |    |        | 0.10 | 18.98                                 |
|                  | M<br>g                | A<br>l | Cr   | Co | Ni        | Cu   | As    | S<br>e | Cd    | Hg | T<br>l | Pb   | Potential<br>Ecological<br>Risk (PER) |
| N1               |                       |        | 0.29 |    | 3.57      | 3.17 | 13.41 |        | 25.2  |    |        | 0.17 | 45.80                                 |
| N2               |                       |        | 0.38 |    | 3.07      | 2.91 | 10.61 |        | 20.4  |    |        | 0.22 | 37.60                                 |
| N3               |                       |        | 0.90 |    | 6.45      | 2.91 | 23.46 |        | 13.2  |    |        | 0.27 | 47.20                                 |

|     |           |           |           |           |           |           |           |           |           |           |           |           |                                        |
|-----|-----------|-----------|-----------|-----------|-----------|-----------|-----------|-----------|-----------|-----------|-----------|-----------|----------------------------------------|
| N4  |           |           | 0.74      |           | 4.96      | 4.57      | 18.44     |           | 18        |           |           | 0.71      | 47.41                                  |
| N5  |           |           | 0.93      |           | 5.26      | 3.17      | 25.14     |           | 15.6      |           |           | 0.25      | 50.34                                  |
| N6  |           |           | 0.69      |           | 23.80     | 2.61      | 27.93     |           | 9.12      |           |           | 0.20      | 64.36                                  |
| N7  |           |           | 0.64      |           | 6.84      | 4.22      | 25.70     |           | 10.44     |           |           | 0.22      | 48.06                                  |
| N8  |           |           | 0.20      |           | 2.58      | 2.66      | 10.61     |           | 13.2      |           |           | 0.16      | 29.42                                  |
| N9  |           |           | 0.45      |           | 5.55      | 3.52      | 15.08     |           | 7.32      |           |           | 0.20      | 32.13                                  |
| N10 |           |           | 0.29      |           | 9.72      | 3.12      | 12.29     |           | 8.04      |           |           | 0.07      | 33.52                                  |
|     |           |           |           |           |           |           |           |           |           |           |           |           |                                        |
|     | <b>Mg</b> | <b>Al</b> | <b>Cr</b> | <b>Co</b> | <b>Ni</b> | <b>Cu</b> | <b>As</b> | <b>Se</b> | <b>Cd</b> | <b>Hg</b> | <b>Tl</b> | <b>Pb</b> | <b>Potential Ecological Risk (PER)</b> |
| S1  |           |           | 2.89      | 4.41      | 13.64     | 4.60      | 42.00     |           | 70.41     | 8         |           | 7.35      | 145.30                                 |
| S2  |           |           | 3.61      | 2.82      | 8.86      | 42.00     | 32.00     |           | 159.18    | 8         |           | 41.18     | 289.66                                 |
| S3  |           |           | 2.89      | 4.71      | 16.36     | 5.00      | 45.33     |           | 85.71     | 8         |           | 7.94      | 167.95                                 |
| S4  |           |           | 2.14      | 3.24      | 9.55      | 11.00     | 36.00     |           | 177.55    | 14        |           | 19.71     | 259.18                                 |
| S5  |           |           | 2.89      | 2.91      | 8.59      | 4.80      | 33.33     |           | 52.04     | 8         |           | 8.82      | 113.39                                 |
| S6  |           |           | 3.37      | 3.53      | 13.36     | 3.40      | 34.67     |           | 55.10     | 8         |           | 2.68      | 116.11                                 |
| S7  |           |           | 3.61      | 3.82      | 12.82     | 5.20      | 42.00     |           | 88.78     | 8         |           | 10.00     | 166.23                                 |
| S8  |           |           | 4.10      | 3.53      | 10.36     | 4.80      | 35.33     |           | 76.53     | 11.6      |           | 9.71      | 144.36                                 |
| S9  |           |           | 3.37      | 5.00      | 17.73     | 5.40      | 44.67     |           | 73.47     | 8         |           | 2.68      | 152.31                                 |

|     |  |  |      |      |           |      |       |  |       |   |  |      |        |
|-----|--|--|------|------|-----------|------|-------|--|-------|---|--|------|--------|
| S10 |  |  | 3.61 | 4.12 | 15.0<br>0 | 4.00 | 42.67 |  | 58.16 | 8 |  | 3.24 | 130.80 |
|-----|--|--|------|------|-----------|------|-------|--|-------|---|--|------|--------|

Table S5. Permissible limits of heavy metals in soil and plants

| No. | Elements      | *Target Values of soil (mg/kg) | **Intervation Values of soil (mg/kg) | ***Permissible Value of plants (mg/kg) |
|-----|---------------|--------------------------------|--------------------------------------|----------------------------------------|
| 1   | Cd (Cadmium)  | 0.8                            | 12                                   | 0.02                                   |
| 2   | Cr (Chromium) | 100                            | 360                                  | 1.3                                    |
| 3   | Cu (Coper)    | 36                             | 190                                  | 10                                     |
| 4   | Pb (Lead)     | 85                             | 530                                  | 2                                      |
| 5   | Ni (Nickel)   | 35                             | 210                                  | 10                                     |

\*Target values are specified to indicate desirable maximum levels of elements in unpolluted soils.

\*\*Intervention when remedial action is necessary; Source: Denneman and Robberse 1990 and Ministry of Housing, Netherland 1994. \*\*\*Source: WHO (1996).



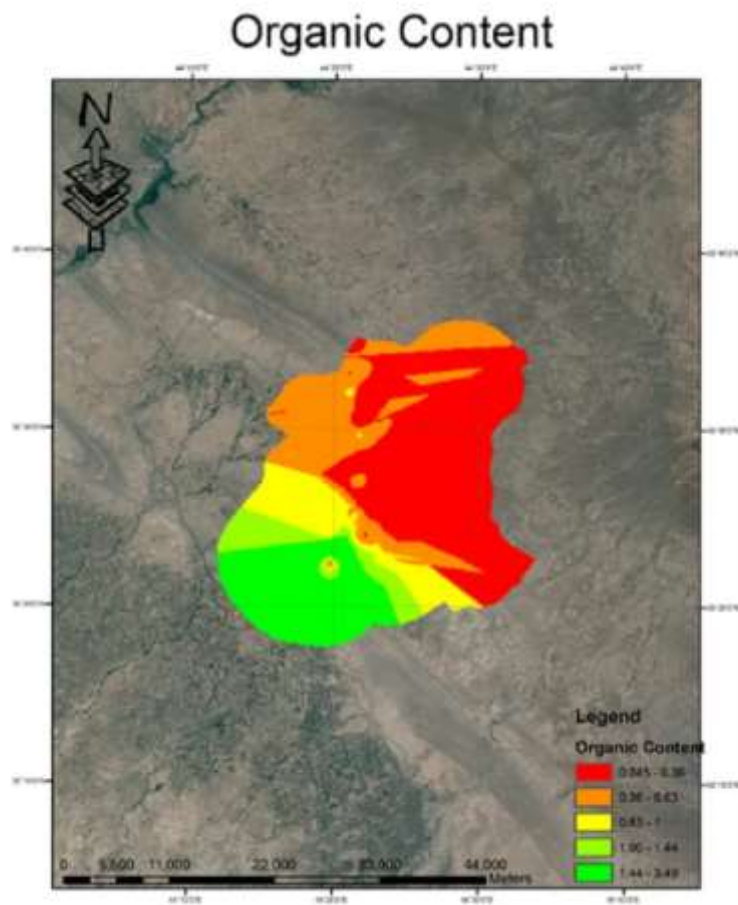

Figure S1: Organic distribution in Kirkuk city [26]
